# Supplementary material for: Chemically bonded graphene/BiOCl nanocomposites as high-performance photocatalysts
Source: Royal Society of Chemistry journal article supplement (doi:10.1039/c2cp41045a), 2012-01-01
Supplement: c2cp41045a.pdf [file c2cp41045a.pdf]

# Chemically Bonded Graphene/BiOCl Nanocomposites as a High-performance Photocatalyst

Feidan Gao,<sup>a</sup> Dawen Zeng,<sup>\*ab</sup> Qingwu Huang,<sup>b</sup> Shouqin Tian<sup>b</sup> and Changsheng Xie<sup>a,b</sup>

<sup>a</sup> State Key Laboratory of Materials Processing and Die & Mould Technology, Huazhong University of Science and Technology (HUST), No. 1037, Luoyu Road, Wuhan 430074, China

<sup>b</sup> Nanomaterials and Smart Sensor Research Laboratory, Department of Materials Science and Engineering, Huazhong University of Science and Technology, No. 1037, Luoyu Road, Wuhan 430074, China

## Supporting Information

Table S1. Detailed information of the deconvoluted C (1s) XPS spectra with peak area

(A) ratios of the oxygen-containing bonds to the CC bonds.

|          | Band              | C-C     | C-O    | C=O    |
|----------|-------------------|---------|--------|--------|
| GR       | Position/eV       | 284.3   | 286.0  | 288.0  |
|          | Area              | 18797.7 | 5450.4 | 4052.2 |
|          | A/A <sub>CC</sub> | 1       | 0.290  | 0.216  |
| GR/BiOCl | Position/eV       | 284.6   | 286.6  | 288.5  |
|          | Area              | 21146.1 | 2628.5 | 1023.0 |
|          | A/A <sub>CC</sub> | 1       | 0.124  | 0.048  |

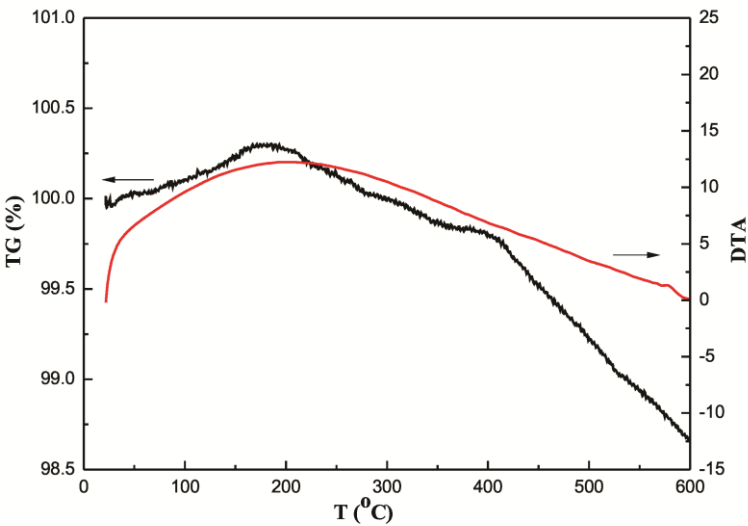

Figure S1. TG-DTA curves of pure BiOCl.

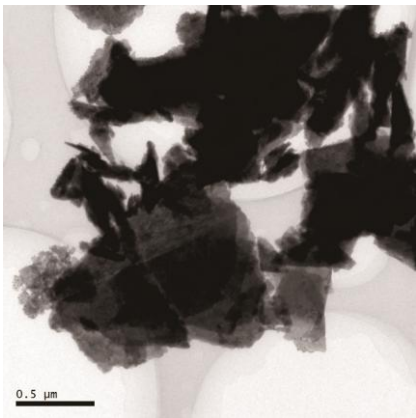

Figure S2. Low magnification TEM images of GR/BiOCl.

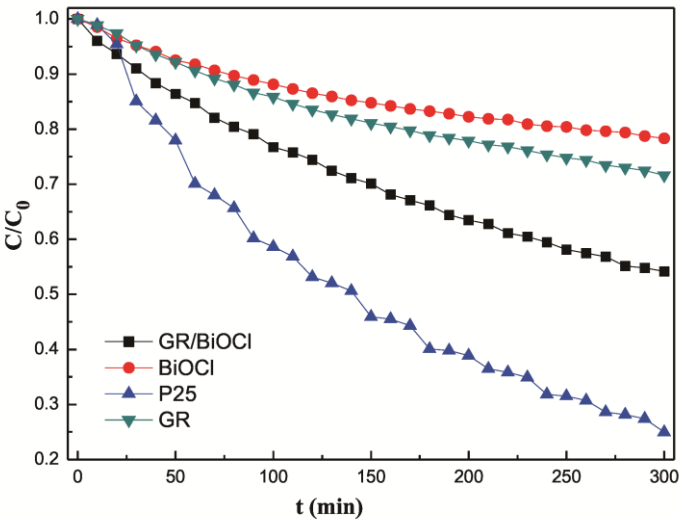

Figure S3. Photodegradation of methylbenzene under UV light over GR/BiOCl, BiOCl, P25 and as-prepared GR.
